# Supplementary material
Source: PubMed Central journal article supplement (PMC3856945)
Supplement: NIHMS530754-supplement-1_si_001.pdf [file NIHMS530754-supplement-1_si_001.pdf]

## Chemoselective layer-by-layer encapsulation of pancreatic islets via hyperbranched polymers

Kerim M. Gattás-Asfura<sup>a</sup>, Cherie L. Stabler<sup>a,b,c</sup>

<sup>a</sup> Diabetes Research Institute, University of Miami, Miami, FL 33136 USA

<sup>b</sup> Department of Biomedical Engineering, University of Miami, Coral Gables, FL 33146 USA

<sup>c</sup> Department of Surgery, University of Miami, Miami, FL 33136 USA

### SUPPLEMENTAL FIGURES

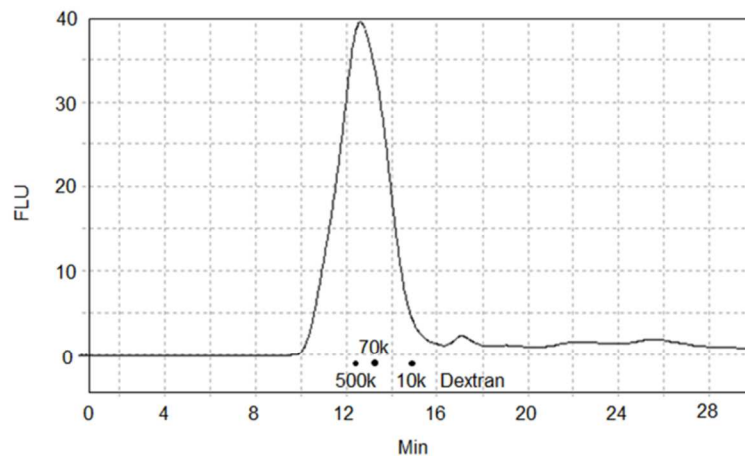

**Figure S-1.** Size exclusion chromatography (SEC) results for hyperbranched ALG-N<sub>3</sub>, in relation to dextran of different molecular weights (500, 70, and 10 kDa).

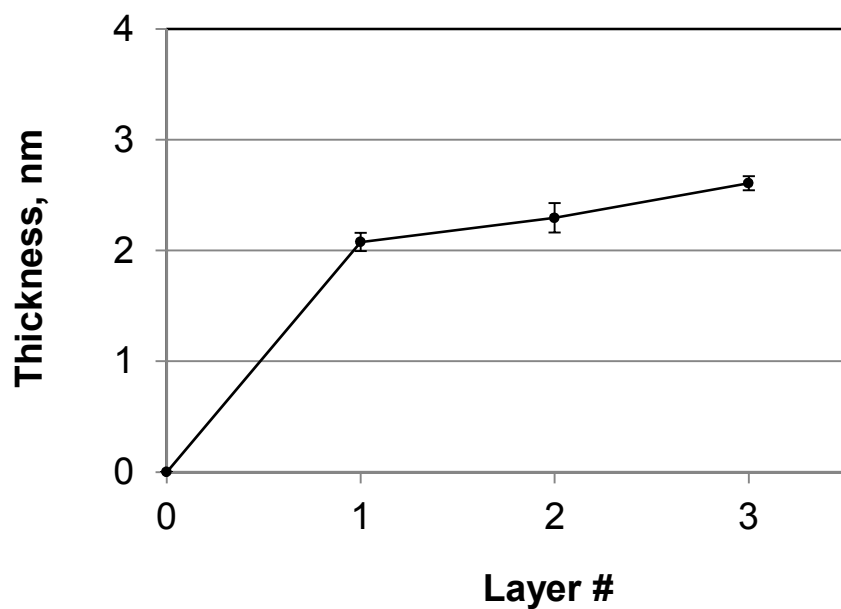

**Figure S-2.** Change in film thickness upon deposition of alternate layers of PAMAM 15/50 and hyperbranched Alg-N<sub>3</sub>. Polymer concentration was 3 mg/mL in PBS (pH 7.35). Each layer was deposited for 10 min at 37 °C followed by rinsing steps in PBS and water.

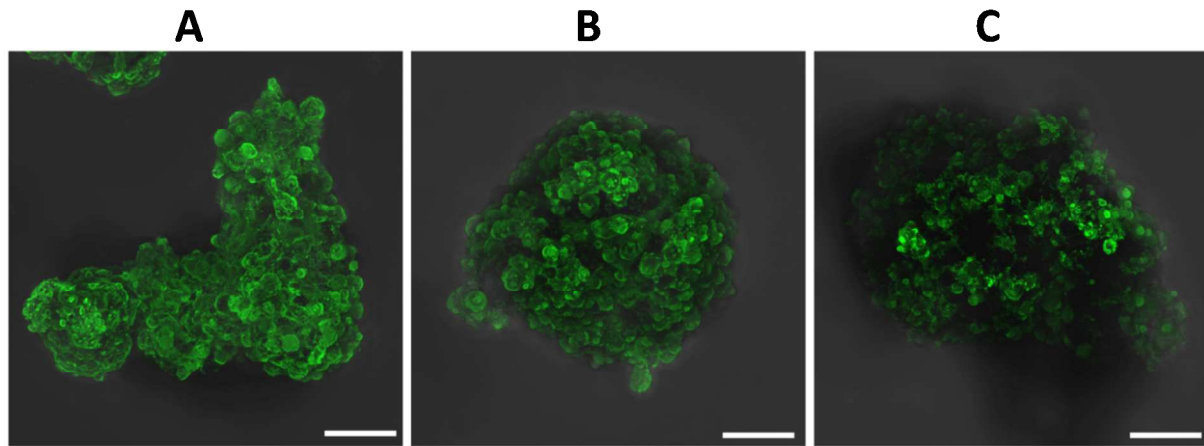

**Figure S-3.** Encapsulation of primary rat pancreatic islets via 6 layers via layer-by-layer assembly of alginate and PAMAM. Evaluation of capsule formation via fluorescein labeled alginate and confocal z-stack projection (**A-C**) imaging of rat pancreatic islets 120 hr after coating. Groups: **(1)** electrostatic assembly via three bilayers of PAMAM 15/0 and fluorescently-labeled hyperbranched Alg-N<sub>3</sub>; **(2)** primary layer of NHS-PEG-N<sub>3</sub>, followed by three bilayers of PAMAM 15/20 and fluorescently-labeled hyperbranched Alg-N<sub>3</sub>; and **(3)** primary layer of NHS-PEG-N<sub>3</sub>, followed by three bilayers of PAMAM 15/40 and fluorescently-labeled hyperbranched Alg-N<sub>3</sub>. Scale bar = 50  $\mu$ m

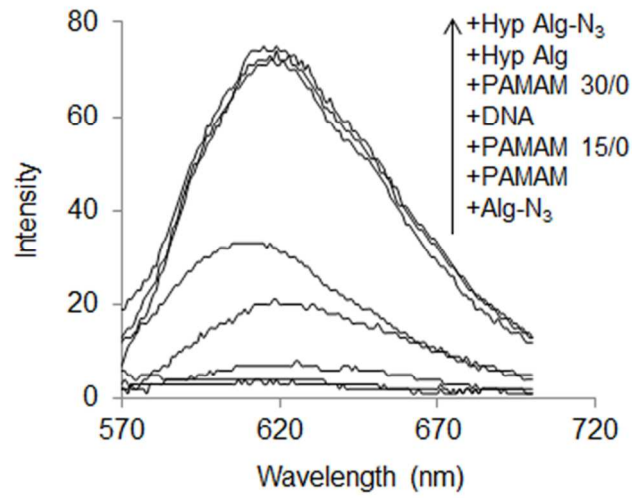

**Figure S-4.** Fluorescence intensity of ethidium homodimer-1 probe following mixing with dendritic materials in solution, as outlined in legend. Concentration of ethidium homodimer-1 (1.2  $\mu\text{L}/\text{mL}$ ) and polymers (3 mg/mL) was the same utilized with cells. Wavelength for excitation was 515 nm.
